1           **High-throughput sequencing of murine immunoglobulin**  
2           **heavy chain transcripts using single side unique molecular**  
3           **identifiers on an Ion Torrent PGM**

4           *Jean-Philippe Bürckert\*<sup>1</sup>, William J. Faison<sup>1</sup>, Axel R.S.X. Dubois<sup>1</sup>, Regina Sinner<sup>1</sup>, Oliver*  
5           *Hunewald<sup>1</sup>, Anke Wienecke-Baldacchino<sup>1</sup>, Anne Brieger<sup>1†</sup> and Claude P. Muller<sup>1†\*</sup>*

6  
7           <sup>1</sup> Department of Infection and Immunity, Luxembourg Institute of Health, Esch-sur-Alzette,  
8           Luxembourg

9           <sup>†</sup> These authors share senior authorship

10

11           \* Corresponding author

12           Mailing address: Luxembourg Institute of Health, House of Biohealth, 29, rue Henri Koch, 4354 Esch-  
13           sur-Alzette, Luxembourg

14           J.-P. Bürckert - jean-philippe.buerckert@lih.lu

15           C. P. Muller – claude.muller@lih.lu

16           **Keywords:** High-throughput sequencing, Murine IG repertoire, unique molecular barcoding,  
17           database benchmarking, IMGT

18 **Abstract (250 words limit)**

19 With the advent of high-throughput sequencing (HTS), profiling immunoglobulin (IG) repertoires has  
20 become an essential part of immunological research. Advances in sequencing technology enable the  
21 IonTorrent Personal Genome Machine (PGM) to cover the full-length of IG mRNA transcripts.  
22 Nucleotide insertions and deletions (indels) are the dominant errors of the PGM sequencing platform  
23 and can critically influence IG repertoire assessments. Here, we present a PGM-tailored IG repertoire  
24 sequencing approach combining error correction through unique molecular identifier (UID)  
25 barcoding and indel detection through ImMunoGeneTics (IMGT), the most commonly used sequence  
26 alignment database for IG sequences. Using artificially falsified sequences for benchmarking, we  
27 found that IMGT efficiently detects 98% of the introduced indels through gene-segment frameshifts.  
28 Undetected indels are either located at the ends of the sequences or produce masked frameshifts  
29 with an insertion and deletion in close proximity. IMGT's indel correction algorithm resolves up to  
30 87% of the tested insertions, but no deletions. The complementary determining regions 3 (CDR3s)  
31 are returned 100% correct for up to 3 insertions or 3 deletions through conservative culling. We  
32 further show, that our PGM-tailored unique molecular identifiers results in highly accurate HTS  
33 datasets if combined with the presented data processing. In this regard, considering sequences with  
34 at least two copies from datasets with UID families of minimum 3 reads result in correct sequences  
35 with over 99% confidence. The protocol and sample processing strategies described in this study will  
36 help to establish benchtop-scale sequencing of IG heavy chain transcripts in the field of IG repertoire  
37 research.

38

## 39 Introduction

40 The diversity of the immunoglobulin (IG) repertoire is the key feature of the adaptive immune  
41 system, enabling it to theoretically combat every possible antigen encountered during an individual's  
42 lifetime [1]. With the development of high-throughput sequencing (HTS) it became possible to  
43 analyze the IG repertoire at high depth [2–6]. Studies, almost a decade ago, established Roche's 454  
44 sequencer as the first tool of choice for exhaustive characterization of IG repertoires due to its  
45 superior read-length [7]. More recently, Illumina's MiSeq and HiSeq sequencers as well as the Ion  
46 Torrent Personal Genome Machine (PGM, Thermo Fisher Scientific) provided an improved  
47 sequencing technologies which can reach across the full V(D)J nucleotide sequence span [8]. The  
48 different technologies of the sequencers result each in their specific error-rates and -types [7,9–15].  
49 Illumina's optical sequencing produces mostly nucleotide (nt) transversions and transitions, which  
50 can be corrected by building consensus sequences [16]. The 454's pyrosequencing chemistry and the  
51 PGMs semiconductor technique mainly introduce homopolymer repeats resulting in insertions and  
52 deletions of bases, which can be corrected by gene segment-wise reference alignment [17].

53 Most sequencing approaches use IG isotype specific constant (C) region primers to translate IG  
54 heavy-chain (IGH) (m)RNA into cDNA, which are subsequently amplified using a set of V-region  
55 specific primers in a multiplex PCR approach. However, this can result in skewed repertoire read-outs  
56 due to biased PCR efficacy [8,14,18]. In addition, sequencing errors can falsify somatic hypermutation  
57 profiles, VDJ germline gene assignment and clonal grouping [8,19]. Unique identifiers (UID) which tag  
58 individual RNA molecules at cDNA transcription level have been used to obtain an unbiased view on  
59 the IG repertoire [20–23]. This method also allows thorough error-correction by building consensus  
60 sequences, albeit at the cost of sequencing depth. In all cases, complex bioinformatic approaches are  
61 necessary to perform raw-read processing [24]. Subsequent alignments to germline genes to assign  
62 VDJ family genes are in general conducted using the ImMunoGeneTics (IMGT) database, which  
63 applies an error correction algorithm for insertions and deletions in the process [25,26].

64 After the initial proof-of-concept studies, the use of animal models to study the IG repertoire  
65 dynamics has been largely ignored [4,6]. One major factor being the lack of a suitable IGH V-region  
66 primer set comparable to BIOMED-2, developed for the human IG repertoire [27]. Yet, animal models  
67 offer advantages over human studies, as they are not limited to peripheral blood and have a lower B  
68 cell diversity [28–31]. As IMGT provides repertoires for various species, we chose to develop a  
69 method to profile the IG repertoire of Balb/C mice, one of the most commonly used animal models.

70 In the present study, the performance of the PGM sequencing platform together with the IMGT  
71 database for the assessment of murine IGH repertoires is evaluated. In this context, several novel  
72 aspects are examined: first, the IMGT database's indel detection and correction algorithm is  
73 benchmarked with a set of artificially falsified sequences. Second, a 16-nucleotide single side UID  
74 (ssUID) barcoding technique tailored to the PGM sequencing chemistry is introduced together with a  
75 swift 1-day library preparation protocol. Third, the PGM's error-rate for sequencing murine IG  
76 transcripts with our barcoding strategy and customized data processing is determined.

77

## 78 **Results**

### 79 **Reference sequences**

80 A set of 7 monoclonal mouse hybridoma cell lines was used to investigate the distribution and  
81 influence of insertions and deletions (indels) produced by the IonTorrent PGM sequencing  
82 technology on murine IGH repertoire sequencing (**Figure 1**). Reference sequences were obtained  
83 from Sanger sequenced cDNA transcripts of monoclonal hybridoma RNA subsequently annotated and  
84 translated into amino acids by IMGT V-QUEST.

### 85 **Distribution of artificial insertions and deletions**

86 To investigate the influence of indels on IMGT processing of an IGH sequence, we generated a  
87 benchmark dataset from the reference sequences that contained artificially introduced indels at

88 random positions (**suppl. table S1**). To cover each position within a 300 nt sequence with minimum  
89 90% certainty, at least 2398 erroneous variants are required [32]. Therefore, we generated 2500  
90 artificial, randomly flawed sequences for each permutation of 0-3 insertions and/or deletions (indels,  
91 annotated as i1d0, i0d1, i1d1 ... i3d3), resulting in a total of 37500 artificial sequences per original  
92 hybridoma sequence with indels ranging from 1 to 6 events. Indels were homogenously present as  
93 determined by graphical reference alignment (**Fig. 2A**). Uncovered positions resulted from indels  
94 within homopolymer stretches which were always assigned to the beginning of such a nucleotide  
95 repeat region (**Fig. 2B**).

#### 96 **IMGT VDJ nt error detection**

97 As each sequence of the benchmark system contained indel errors, all sequences marked by IMGT as  
98 productive were falsely categorized as error free. In general, IMGT correctly recognized 97.9% ( $\pm$   
99 2.9%) of the introduced indels over all datasets and categorized the sequences then either as  
100 productive with detected indels, unproductive or unknown (**Fig. 2C**). Interestingly, only the sets with  
101 one insertion and/or deletion (i1d0, i0d1 and i1d1) exhibited elevated numbers of unrecognized  
102 indels. For these IMGT falsely returned 8% ( $\pm 1.8\%$ ) of the sequences as productive, whereas for all  
103 other datasets it was only 0.7% ( $\pm 0.4\%$ ). Such undetected indels were found at the beginning and  
104 the end of the sequence or across the whole sequence for i1d1 datasets due to indels in close  
105 proximity to each other masking the frame-shifts (**Fig. 2D, Fig. 3, suppl. Fig. S1 and S2**). The number  
106 of unproductive sequences increased with the number of indel events, regardless of their  
107 composition. Accordingly, the number of productive sequences with detected indels decreased. Less  
108 than 50% of sequences with more than 3 indels, were retained. Indels were homogenously  
109 distributed in the uncorrected productive sequences with detected errors until about 4/5<sup>th</sup> of the  
110 sequence lengths while the opposite is true for the uncorrected unproductive sequences (**Fig. 2D,**  
111 **Fig. 3 and suppl. Fig. S2**). This section of the sequence coincides with the IMGT IGH junction which  
112 encodes for the CDR3 [33]. Accordingly, upon detecting an indel in the IGH junction, IMGT  
113 categorized the sequence as unproductive and no corrective attempts were made.

#### 114 **Nucleotide error correction**

115 Upon detection of an indel, IMGT tries to correct it by alignment to its closest germline. The efficacy  
116 of this process was investigated by aligning the sequences with detected indels to determine the  
117 number of correctly resolved sequences (**Fig. 3, Fig. 4 and suppl. Fig. S2**). A thorough error reduction  
118 was observed for up to three insertion errors in datasets without deletions, returning  $87\% \pm 3.2\%$   
119 (i1d0),  $72\% \pm 5.5\%$  (i2d0) and  $56\% \pm 7.0\%$  (i3d0) of productive sequences as correct (**Fig. 4**). Within  
120 these sequences indels that were not corrected by the IMGT were mainly found at the beginning and  
121 end of the sequence (**Fig. 3A, D, E**). In the case of deletions, the IMGT correction introduced a gap for  
122 the missing nucleotide as the original nucleotide was unknown. Consequently, the number of correct  
123 sequences found in datasets with mixed insertions and deletions is very low (i1d1:  $1\% \pm 0.3\%$ , i2d1:  
124  $2\% \pm 0.3\%$ , i3d1:  $2\% \pm 0.6\%$ , i2d2 and i3d2  $<1\%$ ). Nevertheless, in these datasets, the insertions  
125 within the sequences were always reduced (**Fig 3C and suppl. Fig. S2**). No correct sequence could be  
126 identified in deletion-only datasets (**Fig. 4**).

#### 127 **Amino acid error correction**

128 Theoretically, translated amino acids are less influenced by sequencing errors because of the  
129 redundancy of the genetic code. Thus, most amino acid translations were returned correctly in the  
130 case of insertion-only datasets and with slightly higher numbers compared to the nucleotide datasets  
131 (mean correct amino acid sequences for i1d0:  $89\% \pm 2.9\%$ , i2d0:  $76\% \pm 4.7\%$ , i3d0:  $61\% \pm 6.5\%$ , **Fig.**  
132 **4**). Higher numbers of correct translations were observed in mixed indel datasets than for the  
133 corresponding nucleotide datasets (i1d1:  $3\% \pm 0.7\%$ , i2d1:  $4\% \pm 0.6\%$ , i3d1:  $4\% \pm 0.8\%$ , i2d2 and i3d2  
134  $<1\%$ , **Fig. 4**). Interestingly, some amino acid translations were found to be correct for the i0d1  
135 datasets ( $1\% \pm 0.5\%$ , **Fig. 4**). Deletion-affected datasets were usually returned with the wrong amino  
136 acid sequence by the IMGT algorithm. During IMGT processing, nucleotide deletions rendered the  
137 whole codon triplet elusive and were translated as gaps in the amino acid sequence.

138 Remarkably, the CDR3 proved to be protected chiefly from insertions and deletions through a more  
139 conservative correction approach of the IMGT algorithm for this part of the sequence. As mentioned  
140 above, detected indels within the IGH junction, and thus the CDR3, corrupted the entire sequence as  
141 unproductive (**Fig. 3 and suppl. Figure S2**). Culling attempts by IMGT turned out to be largely  
142 successful (100% correct CDR3s for up to 3 insertions or 3 deletions). Even for the i3d3 indel  
143 permutation, IMGT returned  $78\% \pm 4.3\%$  correct CDR3s (**Fig 4**), by removing all those sequences  
144 where indels were detected in the CDR3 encoding nucleotides. Datasets with simultaneous insertions  
145 and deletions showed in general lower numbers of correct CDR3 sequences (range 78-97%). This  
146 resulted from sequences where indels were introduced in close proximity of each other, producing  
147 no detectable frameshift within the IGH junction (**Fig 2D**). While invisible for the IMGT algorithm,  
148 they were observed as variants of the correct CDR3 amino acid sequence.

149 Taken together the above data show, that IMGT processing exhibits adequate detection of indels  
150 through frame-shifts in mouse IGH nt sequences. Consequently, frame-shift masking error  
151 compositions cannot be detected and result in amino acid changes in the translations. IMGTs indel  
152 correction proved to be reliable for single insertions. However, the impossibility to correct for  
153 deletions and larger indel permutations makes consideration of sequences categorized as  
154 “productive with detected indels” unfavorable.

### 155 **HTS of hybridoma ssUID libraries**

156 Next, the IMGT database and a PGM-tailored data processing pipeline developed by our group were  
157 tested using real HTS datasets derived from 7 monoclonal hybridomas (**Figure 1**). The HTS libraries  
158 were prepared using an IonTorrent PGM tailored single-side UID approach (**suppl. Fig. S3**) allowing  
159 for error correction through building consensus sequences from all reads within a UID family [34,35].  
160 The ssUID barcodes together with the C-region primer and appropriate ‘GATC’ spacer were correctly  
161 identified at the sequencing start site of  $99.12\% \pm 0.56\%$  of the usable reads containing a sample  
162 specific MID (**Table 1**). Between 146,010 and 739,854 reads were obtained per sample, with varying

163 ssUID family size distributions (**Fig. 5A**). After raw data processing, 1,431 to 47,169 consensus  
164 sequences were retained per hybridoma (**Table 1**) and uploaded to IMGT HighV-QUEST.

#### 165 **IMGT processing of HTS datasets**

166 The majority of the post-IMGT sequences were categorized as productive (75.8%  $\pm$  22.6%) and 10.9%  
167 ( $\pm$  9.6%) were categorized as productive with detected indels (**Table 2**). The remaining sequences  
168 were either categorized as unproductive or unknown/else. To investigate the undetected or  
169 uncorrected errors within the two productive categories, sequences were aligned to their  
170 corresponding references. For Hybridoma 3, which had the poorest UID distribution (**Figure 5A**), only  
171 26.8% of the sequences were classified as productive and 68.8% unproductive (**Table 2**). This  
172 hybridoma was therefore excluded from further analysis.

173 In the group of productive sequences with detected errors, IMGT's indel correction algorithm  
174 improved the number of correct sequences by 54.1% to on average 55.3% ( $\pm$  32.0%, **Fig. 5B**). As  
175 expected, IMGT corrected most sequences that contained single insertions efficiently, reducing these  
176 errors from average 25.2 ( $\pm$  24.3%) to 0.48% ( $\pm$  0.72%, p-value = 0.0027, two-tailed t-test in  
177 Graphpad Prism, using Holm-Sidak's method [36] to account for multiple testing with alpha = 5%,  
178 **Figure 5B**). Single deletions were found at somewhat higher rates than single insertions (29.9%  $\pm$   
179 24.3%) of the sequences. They increased slightly after IMGT error correction (31.6%  $\pm$  24.1%), as  
180 insertions of higher indel permutations were corrected, leaving only deletions in the sequences.  
181 Accordingly, these higher permutations were found in 33.8% ( $\pm$  23.8%) of the sequences before  
182 error-correction and reduced to 8.8% ( $\pm$  6.3%) afterwards. While the detection of indel errors in the  
183 sequences by IMGT was efficient, the remaining errors after correction still affected 44.7%  $\pm$  32.2% of  
184 the sequences. As described for the benchmarking sequences above, makes further consideration of  
185 sequences marked as "productive with detected indels" inadvisable.

186 Sequences marked as productive without detected indels are not modified by IMGT but can  
187 nonetheless contain indel and nucleotide substitution errors. IMGT does not detect ambiguous  
188 nucleotides as errors but marks them as silent mutations. On average 2.2% ( $\pm$  1.6%) of the consensus



189 sequences in the productive dataset without detected indels contained ambiguous nucleotides  
190 (**Table 3**), which were discarded from the datasets. Most of the remaining sequences were indeed  
191 error-free ( $98.8\% \pm 0.5\%$ , **Fig. 5C**). The other 1.2% contained on average 0.2% ( $\pm 0.1\%$ ) i1d1 indels in  
192 close proximity to each other, masking frameshifts. Some sequences showed single insertions ( $0.1\%$   
193  $\pm 0.2\%$ ) and deletions ( $0.15\% \pm 0.13\%$ ), either at the beginning or the end, without detectable  
194 frameshift. The remaining false sequences contained nucleotide substitutions, with the majority  
195 being transversions ( $0.5\% \pm 0.3\%$ ) and very few transitions ( $< 0.1\%$ ). As described by Shugay and  
196 coworkers, such substitutions originate from dominating polymerase errors occurring early during  
197 the amplification [34]. As polymerase errors are occurring at relatively random positions, it is  
198 stochastically unlikely, that the same errors are found repeatedly within a dataset and can thus be  
199 accounted for by considering only consensus sequences that appear more than once in the final  
200 dataset [34,35]. Following this approach, the data was reassessed, excluding singleton consensus  
201 sequences. This reduced the number of total sequences in the datasets by 0.8% ( $\pm 0.4\%$ ). The  
202 number of transversions was reduced significantly by 0.3% to 0.16% ( $\pm 0.19\%$ , p-value = 0.008, two-  
203 tailed t-test in Graphpad Prism, using Holm-Sidak's method to account for multiple testing with alpha  
204 = 5%, data not shown). Consequently, the number of error-free sequences improved significantly by  
205 0.7% to 99.5% ( $\pm 0.3\%$ , p-value  $< 0.0001$ , two-tailed t-test, using Holm-Sidak's method to account for  
206 multiple testing with alpha = 5%).

207 The number of reads per UID, referred to as UID family size, is crucial to obtain reliable consensus  
208 sequences [35]. Increasing the minimum number of required reads per UID family improved the  
209 amount of correct sequences, reaching 100% for all hybridomas, except Hybridoma 5, albeit with  
210 different UID family sizes (**Figure 5D**). However, with increasing minimum UID family sizes, the  
211 number of sequences decreased exponentially. Consequently, at the point of reaching 100% correct  
212 sequences, on average only 7.9% ( $\pm 7.1\%$ , excl. Hybridoma 5) of the sequences remained (**Figure 5D**).  
213 According to our data, keeping a minimum UID family size of 3 provided adequate accuracy and  
214 throughput when using an IonTorrent PGM.

215 As expected, the number of correct amino acid sequences was higher ( $99.3\% \pm 0.3\%$ ) than the  
216 amount of correct nucleotide sequences (**Figure 5C**). An average of  $0.6\% (\pm 0.4\%)$  of the sequences  
217 was subject to amino acid changes. Excluding singleton amino acid sequences increased the number  
218 of correct amino acid sequences to  $99.7\% (\pm 0.2\%)$ , but this increase was not statistically significant.  
219 CDR3 amino acid sequences were returned almost entirely correct ( $99.85\% \pm 0.11\%$ , Figure 31C),  
220 increasing to  $99.91\% (\pm 0.08\%)$  when singleton full-length amino acid sequences were excluded.  
221

## 222 **Discussion**

223 Investigation of IG repertoires by HTS is challenging both with respect to the library preparation as  
224 well as sequencing error assessment and data processing. Using artificially falsified sequences, we  
225 show here that the IMGT indel detection algorithm is efficient while the IMGT indel correction  
226 algorithm only corrects single insertions sufficiently. We confirm the utility of the IonTorrent PGM to  
227 assess murine IGH repertoires with high confidence, using a dedicated library preparation protocol  
228 with a PGM-tailored 16 nt single side unique identifier (ssUID) barcoding technique. Our data show,  
229 that appropriate data processing reduced the error rate of PGM-sequenced IGH repertoires to less  
230 than 0.5% false nucleotide and amino acid sequences, and to less than 0.01% false CDR3 sequences  
231 per dataset.

232 Sequencing of IGH repertoires requires a thorough assessment and correction of platform inherent  
233 sequencing errors [7,9,12–15]. Using the IMGT database for reference alignment, the indel errors of  
234 the utilized Ion Torrent PGM sequencing platform can theoretically be detected through the resulting  
235 codon frame-shifts [17]. The VDJ structure of the IGH sequence facilitates indel detection by frame-  
236 shift, since gene segments can be aligned separately. In our study, the IMGT algorithm successfully  
237 detects 97.9% of all indels, regardless of their composition, only single insertions or deletions at the  
238 beginning or the end of the sequences (7.9% and 7.5%, respectively), or i1d1 compositions in close  
239 proximity to each other could not be identified (8.5%). IMGT tries to correct detected insertions  
240 subsequently by removing the false nucleotide(s) according to the predicted germline sequence. In  
241 the artificially falsified datasets of our study insertion-only errors were corrected by the IMGT  
242 algorithm with 87% (i1d0), 72% (i2d0) and 56% (i3d0) efficiency. Deletions, on the other hand, are  
243 more difficult to recover since the missing nucleotide cannot necessarily be inferred from the  
244 germline sequence with sufficient confidence. Consequently, artificially introduced deletions were  
245 not corrected by IMGT. Also, for sequences with mixed insertions and deletions only the nucleotide  
246 insertions were corrected by IMGT leaving the sequence erroneous. Taken together, these data  
247 indicate that detection of indels by IMGT is highly efficient and sequences categorized as

248 “productive” without detected errors are almost entirely indel-free. The low efficiency of the indel  
249 correction algorithm makes it inadvisable to take productive sequences with detected indels into  
250 account for any downstream analysis. These correspond to about 10% of the final HTS consensus  
251 sequences in our study.

252 HTS library preparation using multiple primers during template amplification can significantly bias  
253 the repertoire composition [14,19]. This bias is essentially removed by UID barcoding but the  
254 approach reduces sequencing depth at the same time [35,37–39]. In our study, the raw sequencing  
255 depth does not influence the relative number of correct sequences while the average UID family size  
256 proved to be crucial. For instance, Hybridoma 3, although having only the 3<sup>rd</sup> lowest amount of raw-  
257 reads, lacked eligible UID family sizes (> 2 sequences per UID). For this Hybridoma 3, less than 0.5%  
258 of the consensus sequences were built from UID families with more than 2 members, resulting in the  
259 poorest error correction rate during sample processing. Consequently, IMG\_T returned only 26.6% of  
260 the consensus sequences as productive. We therefore conclude from our data, that for applying a  
261 UID family-wise consensus building approach, samples with less than 0.5% eligible consensus reads  
262 after pre-IMG\_T processing do not have enough coverage to achieve sufficient confidence and depth  
263 for the post-IMG\_T sequences and should be discarded from further analysis.

264 For grouping reads by UID families, it is essential to identify the UID tags correctly [35,39]. The PGM  
265 sequencing chemistry is unidirectional, starting with the sequencing adapter A. Comparable  
266 protocols for the Illumina sequencing platforms usually consist of UID tags at the beginning and the  
267 end of the amplicon sequence [40]. We chose to introduce the 16 random nucleotides of the UID tag  
268 at the sequencing start site as the PGM semiconductor technology is significantly less accurate  
269 towards the end of the sequence [41]. We included a 4-nucleotide spacer as junction into the UID tag  
270 resulting in the N8-GATC-N8 ssUID layout of this study. Like this we address that the PGM indel rate  
271 increases in homopolymer stretches with their length [42], in particular when homopolymers are  
272 longer than 8nt [43]. While breaking potential homopolymer patterns within the UID, this design also

273 reduces the number of mistakes during primer synthesis and allows to generate sets of primers with  
274 individual spacers that could be used to tag different experiments.

275 Nucleotide substitution errors are the most difficult to account for in HTS IG repertoire approaches  
276 and can critically falsify somatic hypermutation profiles [16,24]. They can originate from mixed  
277 events of adjacent insertions and deletions, which cannot be detected by the IMGT algorithm or are  
278 introduced as mistakes by the sequencing platform. UID barcoded RNA transcripts allow to address  
279 this problem [8,34,35,40]. B cells contain up to several thousands of identical IG RNA molecules that  
280 are each individually tagged by a UID [40,44]. Therefore, a HTS run provides a snapshot of the  
281 relative abundance of RNA transcripts [16]. Comparable to procedures used for identification of  
282 single nucleotide polymorphisms (SNP), single occurrences of nucleotide substitutions can be ruled  
283 out as artifacts and only transcripts above a certain copy threshold should be retained [44]. Our data  
284 show, that considering sequences with at least 2 copies in the final dataset improves the proportion  
285 of correct sequences by 0.7% to 99.5%. In this regard, as our sampling material are monoclonal  
286 hybridomas, all derived sequences (between 1,431 and 47,169) represent identical RNA molecules,  
287 making it stochastically more likely, that the same indel error appears several times. Thus, it is  
288 expectable, that the positive influence of excluding singletons would be even higher in bulk B cell  
289 derived datasets, where less sequences are derived from identical RNA molecule.

290 In conclusion, we have demonstrated that using our ssUID library preparation in combination with  
291 the IMGT database, the PGM sequencing platform can be efficiently used to assess murine IGH  
292 repertoires. Considering only consensus sequences with at least two copies improved the sequence  
293 quality considerably. Taken together, this approach allowed to obtain highly reliable IGH sequences,  
294 with more than 99% confidence in general and 99.9% confidence for the correct CDR3 sequences.  
295 The protocol and sample processing strategies described in this study will help to establish the  
296 benchtop-scale Ion Torrent sequencing technology of animal models in the field of immunoglobulin  
297 repertoire research.

## 298 **Materials and Methods**

### 299 **RNA extraction**

300 RNA was extracted with Trizol LS/chloroform (Thermo Fisher Scientific, Waltham, USA) method from  
301 seven monoclonal hybridoma cell lines (produced in house) with  $10^6$  cells each. DNA was digested  
302 using the DNafree kit (Thermo Fisher Scientific), RNA was further purified using Agencourt®  
303 RNAClean XP beads (Analisis, Suarlée, BE) and quantified on a NanoDrop® Spectrophotometer  
304 (ND1000, Isogen Life Science, De Meern, NL). RNA was either directly used for library preparation or  
305 stored at -80°C.

### 306 **Reference sequences**

307 Hybridoma cDNA transcripts were obtained using mouse constant region IgG primer (**suppl. table S2**)  
308 in a Superscript III (Thermo Fisher Scientific) reverse transcription following the manufacturer's  
309 instructions for templates with high GC content. Transcripts were Sanger-sequenced (3100 Avant,  
310 Thermo Fisher Scientific) using constant region IgG and V-region primers (**suppl. table S2**). Forward  
311 and reverse sequences were aligned and submitted to IMGT V-QUEST (<http://www.imgt.org>, [45]) to  
312 verify the nucleotide sequence and to translate into amino acids. These sequences were  
313 subsequently used as reference sequences in alignments and artificial error insertion experiments.

### 314 **Datasets with artificial insertions and deletions**

315 Artificial datasets were generated using the Biopieces indel\_seq package (<http://www.biopieces.org>).  
316 For each of the original 7 hybridoma sequences, 2500 error-containing sequences were generated by  
317 combining 0-3 insertions and 0-3 deletions, obtaining a total of 37500 artificial sequences per  
318 hybridoma. For every set, indel-type and -position were determined by alignment to the original  
319 sequence to ensure homogenous error distributions. All artificial datasets were uploaded to IMGT  
320 HighV-QUEST and sorted by annotation: IMGT annotates correct sequences as productive. Sequences  
321 with a detected indel (frameshift, stop codon) are marked as "productive (see comment)" if the error

322 can be corrected (referred to as “productive with detected errors”). Sequences with uncorrectable  
323 errors are classified as “unproductive”. If no fitting germline can be found sequences are marked as  
324 “unknown” or “no result” (referred to as “unknown/else”). The remaining indels on nucleotide level  
325 and amino acid changes were determined using the SeqAn library [46] in a custom-made C++  
326 reference alignment program. For datasets with one insertion and one deletion (i1d1) the positions  
327 of the indels were determined by position-wise mismatch detection using a custom made Biopython  
328 [47] script. Upon detection, the nucleotide positions were returned and the process repeated with  
329 reverse complement sequences.

### 330 **Library preparation and HTS**

331 Approximately 100ng (as determined by Nanodrop®) of total RNA per hybridoma was used for library  
332 preparation. We adapted the UID labeling method developed by Vollmers et al [40] to our PGM  
333 sequencing system (**suppl. Fig. S3**). RNA was reverse transcribed using Superscript III reverse  
334 transcriptase, according to the manufacturer’s instructions, using multiplex identifiers (MID) and UID  
335 tagged mouse constant region (IGH<sub>C</sub>) primers elongated by partial PGM sequencing adapter pA  
336 (**suppl. Table S2**). The MID tag allowed multiplexing of several samples on one sequencing chip. The  
337 UID tag consists of two times 8 random nucleotides separated by a “GATC” spacer (N<sub>8</sub>-GATC-N<sub>8</sub>).  
338 With this UID tag each RNA molecule targeted by the primer is uniquely labeled (see [34,40] for  
339 detailed theoretical descriptions). The RT reaction mixtures were split into two equal second strand  
340 synthesis reactions using Phusion® High-Fidelity DNA polymerase (NEB, Massachusetts, USA) with a  
341 mouse IGH V-region primer mix (**suppl. Table S2**). The reaction conditions were as follows: 98°C  
342 2min, 50°C 2min, 72°C 10 min in a single cycle reaction. Both reaction aliquots were combined and  
343 purified twice using Agencourt® AMPure® XP beads (Analisis) in a 1:1 (v/v) ratio to remove primer  
344 traces. Libraries were subsequently amplified with a Q5® Hot Start High-Fidelity DNA polymerase  
345 (NEB) using the full-length Ion Torrent PGM sequencing adapters A and P1 as primers (**suppl. Table**  
346 **S2**) with the following conditions: 98°C for 1min, 20 cycles of 98°C for 10s, 65°C for 20s, 72°C for 30  
347 seconds. Final elongation was done at 72°C for 2 min. Amplified libraries were purified twice using  
15

348 equal volumes of AMPure® XP beads. Quality of the libraries as well as size of the amplicon and  
349 concentrations were determined using Agilent 2100 Bioanalyzer (Agilent Technologies, Diegem, BE)  
350 with the High Sensitivity DNA Kit (Agilent Technologies). 10 libraries were pooled equimolar on an Ion  
351 316™ Chip (Thermo Fisher Scientific) and sequenced on a PGM sequencer, with all quality trimming  
352 options disabled on the Torrent Suite™ v4.0.2

### 353 **Data processing pipeline for the HTS datasets**

354 Untrimmed raw reads were demultiplexed by their MIDs, retaining only sequences containing the full  
355 UID primer sequence for further analysis, with no mismatches allowed. The UID sequence was  
356 extracted and categorized in relation to the starting position of the detected primer including the  
357 GATC spacer and stored in the sequence identifier. After clipping the MID, UID and constant region  
358 primer, the trimmed reads were quality controlled (80% of the bases Phred-like quality score above  
359 20) and grouped into UID families. Using pagan-msa [48], a consensus sequence was generated for  
360 each UID-family containing more than 2 members. Afterwards, reverse primers were identified with  
361 up to 2 mismatches and clipped. Subsequently, sequences were collapsed to unique reads, storing  
362 counts in the read identifier, and uploaded to IMG\_T for error detection, correction, annotation and  
363 translation into amino acids. Post-IMG\_T datasets were separated into four categories (“productive”,  
364 “productive with detected errors”, “unproductive” and “unknown/else”) and processed separately.  
365 Data processing was performed using custom-made Python scripts (Python v2.7) employed in a  
366 parallelizing bash wrapper script using gnu-parallel [49] and the Biopieces framework  
367 (<http://www.biopieces.org/>).

### 368 **Graphs and statistics**

369 All graphs and statistical analyses were performed using R base packages or GraphPad Prism 6.  
370 Average numbers are reported as mean ± standard deviation (SD) unless specified otherwise.



## 371 **Figure legends**

372 **Figure 1: Study design.** RNA was extracted from 7 monoclonal hybridoma cell lines and reverse  
373 transcribed into cDNA. cDNA sequences were determined by Sanger sequencing and submitted to  
374 IMGT to determine reference sequences. Reference sequences were artificially falsified using the  
375 indel\_seq program, introducing up to 3 insertions and 3 deletions. 2500 artificial sequences were  
376 generated for each permutation and hybridoma and processed by IMGT. Post-IMGT sequences were  
377 aligned to the references to determine error detection and correction. RNA was also used to  
378 generate high-throughput sequencing (HTS) libraries in a three-step library preparation protocol.  
379 Single side unique identifiers (ssUID) were introduced during reverse transcription to tag each RNA  
380 molecule individually (see also **suppl. Fig. S3**). Libraries were sequenced on an Ion Torrent PGM  
381 sequencer with all quality trimming options disabled in the Torrent Suite software. Untrimmed raw  
382 sequences were processed with a custom-made bioinformatics pipeline generating consensus  
383 sequences per UID family. Collapsed consensus sequences were submitted to IMGT and post-IMGT  
384 sequences aligned to the reference sequences to determine error detection and correction.

385 **Figure 2. Indels in the artificial dataset.** (A) Insertion and deletion events displayed as determined by  
386 graphical alignments of the reference sequence to the i1d0 and i0d1 dataset of hybridoma 1. Grey  
387 bars represent the actual detected indel and the black line presents the moving average over 4  
388 neighbors. The dotted lines vertical present the segment that is magnified in (B) to visualize the  
389 problem of determining the position of indels in homopolymer repeats. (C) Indel detection rates by  
390 IMGT processing shown as bar chart with error bars indicating the SD over all 7 datasets (D)  
391 Visualization of indel proximity. The distances between the first and second indel before correction in  
392 the i1d1 dataset of hybridoma 1 are shown as scatterplot. Dotted lines indicate the position of the  
393 IMGT junction. Productive sequences with detected indels are shown in light grey, unproductive  
394 sequences are shown in dark grey. Sequences without detected errors are shown in black. The  
395 remaining i1d1 indel proximity graphs are shown in the **supplementar Figure S1**.

396 **Figure 3. Artificial indel set alignments.** Indel positions are shown before and after IMGT error  
397 correction for artificially falsified Hybridoma 1 sequences separated by productivity. (A) The indels  
398 for the i1d0 dataset are shown per nucleotide position as line plot (smoothed over 4 neighbors).  
399 The grey area marks the IGH VDJ junction. (B-E) like (A) but with different permutations. The  
400 remaining permutations are displayed in the **supplementary Figure S2**.

401 **Figure 4. Correction of artificially introduced indels by IMGT.** The fraction of correct sequences for  
402 each artificial benchmark permutation of indels are shown as bar charts of nucleotide (nt), amino  
403 acid (aa) and CDR3 amino acid sequences. Error bars indicate SD over all 7 datasets.

404 **Figure 5. HTS data on monoclonal hybridomas.** (A) UID family size distributions per sample. The  
405 number of UID families (log transformed) is plotted by the number of reads assigned to a ssUID per  
406 hybridoma. The amount of UID families containing a minimum of 3 reads are indicated as percentage  
407 value. (B) Indel distributions on productive sequences with detected errors. The amount of indel-free  
408 (i0d0), single insertions (i1d0), single deletions (i0d1), one single insertion and deletion (i1d1) and  
409 higher permutations are shown as fraction of productive reads with detected indels before (circles)  
410 and after (squares) IMGT error correction. Statistical differences are indicated with \*\*\*\*  $p < 0.0001$ ,  
411 \*  $p < 0.05$ , multiple two tailed t-test with Holm-Sidak's method to account for multiple testing. (C)  
412 The number of error-free sequences in the productive dataset without detected indels are shown as  
413 scatterplot with mean and  $\pm$  SD. Data are shown for all nucleotide sequences (nt), amino acid  
414 sequences (aa) and CDR3s for all sequences and data without singleton sequences. CDR3 singleton  
415 exclusion was performed on the basis of full-length amino acid sequences. P values are indicated \*\*\*  
416  $p < 0.001$ , \*  $< 0.05$ , One-way ANOVA with Sidak's post-hoc test. All other differences were not  
417 statistically significant. (D) Influence of UID family size on the number of correct sequences. The  
418 number of correct sequences are shown as black line per minimum UID family size (left y-axis). The  
419 number of consensus sequences are shown as dotted line per minimum family size (right y-axis). The  
420 UID family size at which all sequences are correct is indicated by a grey vertical line for Hybridoma  
421 1,2,4,6 and 7, the dataset of Hybridoma 5 does not reach 100% correct sequences.

422 **Figure S1: Indel positions for mixed i1d1 datasets of hybridomas 2-7.** The distances between the  
423 first and second indel before correction in the i1d1 dataset of hybridomas 2-7 are shown as  
424 scatterplots. Dotted lines indicate positions of IMGT junctions. Productive sequences with detected  
425 indels are shown in grey, unproductive sequences are shown in dark grey. Sequences without  
426 detected errors are shown in black.

427 **Figure S2: Additional artificial indel set alignments.** Indel positions are shown before and after IMGT  
428 error correction for artificially falsified Hybridoma 1 sequences separated by productivity. The indels  
429 for the datasets i1d2, i1d3, i2d1, i2d2, i2d3, i3d1, i3d2, i3d3, i0d2, i0d2 are shown per nucleotide  
430 position as line plot (smoothened over 4 neighbors). The grey area marks the IGH VDJ junction.

431 **Figure S3. 3-step PGM ssUID sequencing library preparation.** (A) In a first step, purified mRNA is  
432 used in a Superscript III reverse transcription. The Primer for the reverse transcription is specific for  
433 the murine IG C region and elongated by an MID for sample multiplexing as well as a UID consisting  
434 of 2x 8 random nucleotides (N8) separated by a 4-nucleotide spacer ('GATC'). The primer ends with  
435 the partial PGM sequencing adapter pA. (B) In the second step, a mix of 26 IG VH region targeting  
436 primers (elongated by the partial PGM sequencing adapter pP1) is used in a single cycle PCR reaction  
437 to avoid amplification. The product of this reaction is purified twice with Agencourt® AMPureXP  
438 beads to remove the VH primers from the reaction mixture. (C) In the final step, the purified reaction  
439 mixture is amplified using the full-length P1 and A adapters as primers in a 20 cycle PCR reaction. The  
440 product is as well purified twice to obtain the ssUID-tagged sequencing library.

441

442

443

444

445

446

447

448

449

## 450 Tables

451 **Table 1 HTS datasets pre-IMGT**

| Set  | CDR3           | Chip | reads with MID | reads with primer & UID | consensus sequences |
|------|----------------|------|----------------|-------------------------|---------------------|
| HYB1 | SRWDYRYVYYPLDY | A    | 207,753        | 206,929                 | 4,159               |
| HYB2 | ARTYYGSYGFDY   | A    | 147,634        | 146,010                 | 7,760               |
| HYB3 | ARQWLILWLGFA   | A    | 222,929        | 222,100                 | 1,431               |
| HYB4 | ARWDYRYVYYPLDY | A    | 882,242        | 877,823                 | 16,643              |
| HYB5 | TRGYRYDGGFY    | B    | 747,827        | 733,258                 | 7,319               |
| HYB6 | APKGLAY        | B    | 743,465        | 739,854                 | 47,169              |
| HYB7 | ASRTTATGY      | B    | 204,348        | 201,619                 | 5,426               |

452

453 **Table 2 HTS datasets post-IMGT**

| Set  | prod. seq. | %     | prod. w. det. indel | %     | unprod | %     | unknown / else | %    |
|------|------------|-------|---------------------|-------|--------|-------|----------------|------|
| HYB1 | 3,328      | 79.6% | 622                 | 14.9% | 127    | 3.0%  | 102            | 2.4% |
| HYB2 | 4,866      | 62.7% | 2,449               | 31.6% | 250    | 3.2%  | 195            | 2.5% |
| HYB3 | 381        | 26.6% | 62                  | 4.3%  | 984    | 68.8% | 4              | 0.3% |
| HYB4 | 13,515     | 81.2% | 2,215               | 13.3% | 329    | 2.0%  | 584            | 3.5% |
| HYB5 | 6,697      | 91.5% | 281                 | 3.8%  | 51     | 0.7%  | 290            | 4.0% |
| HYB6 | 43,767     | 92.8% | 3,009               | 6.4%  | 287    | 0.6%  | 106            | 0.2% |
| HYB7 | 5,216      | 96.1% | 111                 | 2.0%  | 15     | 0.3%  | 84             | 1.5% |
| Mean | 11,110     | 75.8% | 1,250               | 10.9% | 292    | 11.2% | 195            | 2.1% |
| SD   | 13,842     | 22.6% | 1,165               | 9.6%  | 303    | 23.5% | 180            | 1.4% |

454

455 **Table 3 Ambiguous nt in HTS datasets**

|        | HYB1 | HYB2 | HYB4 | HYB5 | HYB6 | HYB7 | Mean | SD  |
|--------|------|------|------|------|------|------|------|-----|
| Amb nt | 26   | 135  | 97   | 90   | 2289 | 148  | 464  | 817 |
| %      | 0.8  | 2.6  | 0.7  | 1.3  | 5.2  | 2.8  | 2.2  | 1.6 |

456

## 457 Abbreviations

458 CDR3 – complementary determining region 3

459 HTS – high-throughput sequencing

460 IG – immunoglobulin

461 IGH – immunoglobulin heavy chain

462 IMGT – ImMunoGeneTics

463 indel – insertions and deletions of nucleotides

464 MID – multiplex identifier

465 nt – nucleotide

466 PGM – (Ion Torrent) Personal Genome Machine

467 UID – Unique (molecular) identifier

468 ssUID – single side unique molecular identifier  
469

## 470 **Authors Contribution**

471 J.-P.B. designed research, cultivated hybridomas, performed library preparation, developed  
472 bioinformatics approaches, performed data processing, interpreted data and wrote the manuscript.  
473 W.J.F. and O.H. supported and developed bioinformatics approaches and performed data processing.  
474 A.R.S.X.D designed research and interpreted data. A.W-B. developed and wrote the raw data  
475 processing bioinformatics pipeline. R.S. performed Ion Torrent PGM sequencing. A.B. designed  
476 research, supervised work, assisted library preparation and hybridoma cultivation and interpreted  
477 data C.P.M. supervised work, provided important intellectual input and interpreted data. All authors  
478 have read and corrected the manuscript.

## 479 **Acknowledgements**

480 J.-P.B. was supported by the Aides à la Formation-Recherche (AFR) individual PhD grant of the Fonds  
481 National de la Recherche of Luxemburg ([www.fnr.lu](http://www.fnr.lu), grant 7039209). We would like to thank Josiane  
482 Kirpach for independently verifying the library preparation protocol and Fleur A.D. Leenen for  
483 critically revising the manuscript.

## 484 **Conflict of Interest**

485 The authors declare no conflict of interest.

## 486 **Funding**

487 J.-P. Bürckert and A.R.S.X. Dubois were supported by the AFR (Aides à la Formation Recherche)  
488 fellowships #7039209 and #1196376, respectively, from the FNR (Fonds National de la Recherche),  
489 Luxembourg.

## 490 **References**

- 491 1. Tonegawa S. Somatic generation of antibody diversity. *Nature*. 1983; 302: 575–81. doi:  
492 10.1038/302575a0.
- 493 2. Reddy ST, Georgiou G. Systems analysis of adaptive immunity by utilization of high-  
494 throughput technologies. *Curr Opin Biotechnol*. 2011; 22: 584–9. doi:  
495 10.1016/j.copbio.2011.04.015.
- 496 3. Fischer N. Sequencing antibody repertoires: The next generation. *MAbs*. ; 2011 [cited 2012  
497 Nov 26]; 3: 17–20. doi: 10.4161/mabs.3.1.14169.
- 498 4. Reddy ST, Ge X, Miklos AE, Hughes RA, Kang SH, Hoi KH, Chrysostomou C, Hunicke-Smith SP,  
499 Iverson BL, Tucker PW, Ellington AD, Georgiou G. Monoclonal antibodies isolated without  
500 screening by analyzing the variable-gene repertoire of plasma cells. *Nat Biotechnol*. 2010; 28:  
501 965–9. doi: 10.1038/nbt.1673.
- 502 5. Boyd SD, Marshall EL, Merker JD, Maniar JM, Zhang LN, Sahaf B, Jones CD, Simen BB,  
503 Hanczaruk B, Nguyen KD, Nadeau KC, Egholm M, Miklos DB, et al. Measurement and clinical

- 504 monitoring of human lymphocyte clonality by massively parallel {VDJ} pyrosequencing. *Sci*  
505 *Transl Med.* ; 2009; 1: 12ra23. doi: 10.1126/scitranslmed.3000540.
- 506 6. Weinstein JA, Jiang N, White RA, Fisher DS, Quake SR. High-Throughput Sequencing of the  
507 Zebrafish Antibody Repertoire. *Science* (80- ). 2009; 324: 807–10. doi:  
508 10.1126/science.1170020.
- 509 7. Metzker ML. Sequencing technologies - the next generation. *Nat Rev Genet.* 2010; 11: 31–46.  
510 doi: 10.1038/nrg2626.
- 511 8. He L, Sok D, Azadnia P, Hsueh J, Landais E, Simek M, Koff WC, Pognard P, Burton DR, Zhu J.  
512 Toward a more accurate view of human B-cell repertoire by next-generation sequencing,  
513 unbiased repertoire capture and single-molecule barcoding. *Sci Rep.* 2015; 4: 6778. doi:  
514 10.1038/srep06778.
- 515 9. Huse SM, Huber J a, Morrison HG, Sogin ML, Welch DM. Accuracy and quality of massively-  
516 parallel DNA pyrosequencing. *Genome Biol.* 2007; 8: R143. doi: 10.1186/gb-2007-8-7-r143.
- 517 10. Nguyen P, Ma J, Pei D, Obert C, Cheng C, Geiger TL. Identification of errors introduced during  
518 high throughput sequencing of the T cell receptor repertoire. *BMC Genomics.* 2011; 12: 106.  
519 doi: 10.1186/1471-2164-12-106.
- 520 11. Fuellgrabe MW, Herrmann D, Knecht H, Kuenzel S, Kneba M, Pott C, Brüggemann M. High-  
521 Throughput, Amplicon-Based Sequencing of the CREBBP Gene as a Tool to Develop a  
522 Universal Platform-Independent Assay. *PLoS One.* 2015; 10: e0129195. doi:  
523 10.1371/journal.pone.0129195.
- 524 12. Zhu J, O’Dell S, Ofek G, Pancera M, Wu X, Zhang B, Zhang Z, Mullikin JC, Simek M, Burton DR,  
525 Koff WC, Shapiro L, Mascola JR, et al. Somatic populations of PGT135-137 HIV-1-neutralizing  
526 antibodies identified by 454 pyrosequencing and bioinformatics. *Front Microbiol.* 2012; 3:  
527 315. doi: 10.3389/fmicb.2012.00315.
- 528 13. Deng W, Maust BS, Westfall DH, Chen L, Zhao H, Larsen BB, Iyer S, Liu Y, Mullins JI. Indel and  
529 Carryforward Correction (ICC): A new analysis approach for processing 454 pyrosequencing  
530 data. *Bioinformatics.* 2013; 29: 2402–9. doi: 10.1093/bioinformatics/btt434.
- 531 14. Baum PD, Venturi V, Price DA. Wrestling with the repertoire: The promise and perils of next  
532 generation sequencing for antigen receptors. *Eur J Immunol.* 2012; 42: 2834–9. doi:  
533 10.1002/eji.201242999.
- 534 15. Bolotin DA, Mamedov IZ, Britanova O V., Zvyagin I V., Shagin D, Ustyugova S V., Turchaninova  
535 MA, Lukyanov S, Lebedev YB, Chudakov DM. Next generation sequencing for TCR repertoire  
536 profiling: Platform-specific features and correction algorithms. *Eur J Immunol.* 2012; 42:  
537 3073–83. doi: 10.1002/eji.201242517.
- 538 16. Georgiou G, Ippolito GC, Beausang J, Busse CE, Wardemann H, Quake SR. The promise and  
539 challenge of high-throughput sequencing of the antibody repertoire. *Nat Biotechnol.* 2014;  
540 32: 158–68. doi: 10.1038/nbt.2782.
- 541 17. Zhu J, Ofek G, Yang Y, Zhang B, Louder MK, Lu G, McKee K, Pancera M, Skinner J, Zhang Z,  
542 Parks R, Eudailey J, Lloyd KE, et al. Mining the antibodyome for HIV-1-neutralizing antibodies  
543 with next-generation sequencing and phylogenetic pairing of heavy/light chains. *Proc Natl*  
544 *Acad Sci U S A.* 2013; 110: 6470–5. doi: 10.1073/pnas.1219320110.
- 545 18. Carlson CS, Emerson RO, Sherwood AM, Desmarais C, Chung M-W, Parsons JM, Steen MS,  
546 LaMadrid-Herrmannsfeldt M a, Williamson DW, Livingston RJ, Wu D, Wood BL, Rieder MJ, et  
547 al. Using synthetic templates to design an unbiased multiplex PCR assay. *Nat Commun.* 2013;

- 548 4: 2680. doi: 10.1038/ncomms3680.
- 549 19. Khan TA, Friedensohn S, de Vries ARG, Straszewski J, Ruscheweyh H-J, Reddy ST. Accurate and  
550 predictive antibody repertoire profiling by molecular amplification fingerprinting. *Sci Adv.*  
551 2016; 2: e1501371–e1501371. doi: 10.1126/sciadv.1501371.
- 552 20. Best K, Oakes T, Heather JM, Shawe-Taylor J, Chain B. Computational analysis of stochastic  
553 heterogeneity in PCR amplification efficiency revealed by single molecule barcoding. *Sci Rep.*  
554 Nature Publishing Group; 2015; 5: 14629. doi: 10.1038/srep14629.
- 555 21. Cocquet J, Chong A, Zhang G, Veitia RA. Reverse transcriptase template switching and false  
556 alternative transcripts. *Genomics.* 2006; 88: 127–31. doi: 10.1016/j.ygeno.2005.12.013.
- 557 22. Fu GK, Wilhelmy J, Stern D, Fan HC, Fodor SPA. Digital encoding of cellular mRNAs enabling  
558 precise and absolute gene expression measurement by single-molecule counting. *Anal Chem.*  
559 2014; 86: 2867–70. doi: 10.1021/ac500459p.
- 560 23. Choi NM, Loguercio S, Verma-Gaur J, Degner SC, Torkamani A, Su AI, Oltz EM, Artyomov M,  
561 Feeney AJ. Deep sequencing of the murine IgH repertoire reveals complex regulation of  
562 nonrandom V gene rearrangement frequencies. *J Immunol.* 2013; 191: 2393–402. doi:  
563 10.4049/jimmunol.1301279.
- 564 24. Yaari G, Kleinstein SH. Practical guidelines for B-cell receptor repertoire sequencing analysis.  
565 *Genome Med.* 2015; 7: 121. doi: 10.1186/s13073-015-0243-2.
- 566 25. Alamyar E, Duroux P, Lefranc MP, Giudicelli V. IMGT® tools for the nucleotide analysis of  
567 immunoglobulin (IG) and t cell receptor (TR) V-(D)-J repertoires, polymorphisms, and IG  
568 mutations: IMGT/V-QUEST and IMGT/HighV-QUEST for NGS. *Methods in Molecular Biology.*  
569 2012. p. 569–604. doi: 10.1007/978-1-61779-842-9\_32.
- 570 26. Lefranc M-P, Giudicelli V, Duroux P, Jabado-Michaloud J, Folch G, Aouinti S, Carillon E,  
571 Duvergey H, Houles A, Paysan-Lafosse T, Hadi-Saljoqi S, Sasorith S, Lefranc G, et al. IMGT(R),  
572 the international ImMunoGeneTics information system(R) 25 years on. *Nucleic Acids Res.*  
573 2015; 43: D413–22. doi: 10.1093/nar/gku1056.
- 574 27. van Dongen JJM, Langerak AW, Brüggemann M, Evans PAS, Hummel M, Lavender FL,  
575 Delabesse E, Davi F, Schuurin E, García-Sanz R, van Krieken JHJM, Droese J, González D, et al.  
576 Design and standardization of PCR primers and protocols for detection of clonal  
577 immunoglobulin and T-cell receptor gene recombinations in suspect lymphoproliferations:  
578 report of the BIOMED-2 Concerted Action BMH4-CT98-3936. *Leukemia.* 2003; 17: 2257–317.  
579 doi: 10.1038/sj.leu.2403202.
- 580 28. Mestas J, Hughes CCW. Of mice and not men: differences between mouse and human  
581 immunology. *J Immunol.* 2004; 172: 2731–8. doi: 10.4049/jimmunol.172.5.2731.
- 582 29. Simonetti G, Teresa M, Bertilaccio S, Ghia P, Klein U. Perspectives Mouse models in the study  
583 of chronic lymphocytic leukemia pathogenesis and therapy. *Blood.* 2014; 124: 1010–9. doi:  
584 10.1182/blood-2014-05-577122.The.
- 585 30. Schroeder HW. Similarity and divergence in the development and expression of the mouse  
586 and human antibody repertoires. *Dev Comp Immunol.* 2006; 30: 119–35. doi:  
587 10.1016/j.dci.2005.06.006.
- 588 31. Janeway CA, Travers P, Walport M, Shlomchik MJ. *Immunobiology.* 2001. doi: NBK10757.
- 589 32. Hildebrand M V. The birthday problem. *Am Math Mon.* 1993; 100: 643.
- 590 33. Monod MY, Giudicelli V, Chaume D, Lefranc MP. IMGT/JunctionAnalysis: The first tool for the



- 591 analysis of the immunoglobulin and T cell receptor complex V-J and V-D-J JUNCTIONs.  
592 Bioinformatics. 2004; 20: i379–85. doi: 10.1093/bioinformatics/bth945.
- 593 34. Shugay M, Britanova O V, Merzlyak EM, Turchaninova M a, Mamedov IZ, Tuganbaev TR,  
594 Bolotin D a, Staroverov DB, Putintseva E V, Plevova K, Linnemann C, Shagin D, Pospisilova S, et  
595 al. Towards error-free profiling of immune repertoires. *Nat Methods*. 2014; 11: 653–5. doi:  
596 10.1038/nmeth.2960.
- 597 35. Turchaninova MA, Davydov A, Britanova O V, Shugay M, Bikos V, Egorov ES, Kirgizova VI,  
598 Merzlyak EM, Staroverov DB, Bolotin DA, Mamedov IZ, Izraelson M, Logacheva MD, et al.  
599 High-quality full-length immunoglobulin profiling with unique molecular barcoding. *Nat*  
600 *Protoc*. 2016; 11: 1599–616. doi: 10.1038/nprot.2016.093.
- 601 36. Holm S. A simple sequentially rejective multiple test procedure. *Scand J Stat*. 1979; Available  
602 from <http://www.jstor.org/stable/4615733>
- 603 37. Shiroguchi K, Jia TZ, Sims PA, Xie XS. Digital RNA sequencing minimizes sequence-dependent  
604 bias and amplification noise with optimized single-molecule barcodes. *Proc Natl Acad Sci U S*  
605 *A*. 2012; 109: 1347–52. doi: 10.1073/pnas.1118018109.
- 606 38. Mamedov IZ, Britanova O V., Zvyagin I V., Turchaninova MA, Bolotin DA, Putintseva E V.,  
607 Lebedev YB, Chudakov DM. Preparing unbiased T-cell receptor and antibody cDNA libraries for  
608 the deep next generation sequencing profiling. *Front Immunol*. 2013; 4: 456. doi:  
609 10.3389/fimmu.2013.00456.
- 610 39. Egorov ES, Merzlyak EM, Shelenkov AA, Britanova O V, Sharonov G V, Staroverov DB, Bolotin  
611 DA, Davydov AN, Barsova E, Lebedev YB, Shugay M, Chudakov DM. Quantitative Profiling of  
612 Immune Repertoires for Minor Lymphocyte Counts Using Unique Molecular Identifiers. *J*  
613 *Immunol*. 2015; 194: 6155–63. doi: 10.4049/jimmunol.1500215.
- 614 40. Vollmers C, Sit R V, Weinstein J a, Dekker CL, Quake SR. Genetic measurement of memory B-  
615 cell recall using antibody repertoire sequencing. *Proc Natl Acad Sci U S A*. 2013; 110: 13463–8.  
616 doi: 10.1073/pnas.1312146110.
- 617 41. Loman NJ, Misra R V, Dallman TJ, Constantinidou C, Gharbia SE, Wain J, Pallen MJ.  
618 Performance comparison of benchtop high-throughput sequencing platforms. *Nat Biotechnol*.  
619 2012; 30: 434–9. doi: 10.1038/nbt.2198.
- 620 42. Bragg LM, Stone G, Butler MK, Hugenholtz P, Tyson GW. Shining a Light on Dark Sequencing:  
621 Characterising Errors in Ion Torrent PGM Data. *PLoS Comput Biol*. 2013; 9: e1003031. doi:  
622 10.1371/journal.pcbi.1003031.
- 623 43. Quail MM, Smith ME, Coupland P, Otto TDT, Harris SRS, Connor TR, Bertoni A, Swerdlow HHP,  
624 Gu Y, Rothberg J, Hinz W, Rearick T, Schultz J, et al. A tale of three next generation sequencing  
625 platforms: comparison of Ion torrent, pacific biosciences and illumina MiSeq sequencers. *BMC*  
626 *Genomics*. *BMC Genomics*; 2012; 13: 341. doi: 10.1186/1471-2164-13-341.
- 627 44. Kinde I, Wu J, Papadopoulos N, Kinzler KW, Vogelstein B. Detection and quantification of rare  
628 mutations with massively parallel sequencing. *Proc Natl Acad Sci U S A*. 2011; 108: 9530–5.  
629 doi: 10.1073/pnas.1105422108.
- 630 45. Brochet X, Lefranc M-P, Giudicelli V. IMGT/V-QUEST: the highly customized and integrated  
631 system for IG and TR standardized V-J and V-D-J sequence analysis. *Nucleic Acids Res*. 2008;  
632 36: W503–8. doi: 10.1093/nar/gkn316.
- 633 46. Iacobuzio-Donahue CA, Ashfaq R, Maitra A, Adsay NV, Shen-Ong GL, Berg K, Hollingsworth  
634 MA, Cameron JL, Yeo CJ, Kern SE, Goggins M, Hruban RH. Highly Expressed Genes in

- 635 Pancreatic Ductal Adenocarcinomas: A Comprehensive Characterization and Comparison of  
636 the Transcription Profiles Obtained from Three Major Technologies. *Cancer Res.* 2003; 63:  
637 8614–22. doi: 10.1126/science.1058040.
- 638 47. Cock PJA, Antao T, Chang JT, Chapman BA, Cox CJ, Dalke A, Friedberg I, Hamelryck T, Kauff F,  
639 Wilczynski B, De Hoon MJL. Biopython: Freely available Python tools for computational  
640 molecular biology and bioinformatics. *Bioinformatics.* Oxford University Press; 2009; 25:  
641 1422–3. doi: 10.1093/bioinformatics/btp163.
- 642 48. Löytynoja A, Vilella AJ, Goldman N. Accurate extension of multiple sequence alignments using  
643 a phylogeny-aware graph algorithm. *Bioinformatics.* 2012; 28: 1684–91. doi:  
644 10.1093/bioinformatics/bts198.
- 645 49. Tange O. GNU Parallel: the command-line power tool. *USENIX Mag.* 2011; 36: 42–7. doi:  
646 10.5281/zenodo.16303.
- 647

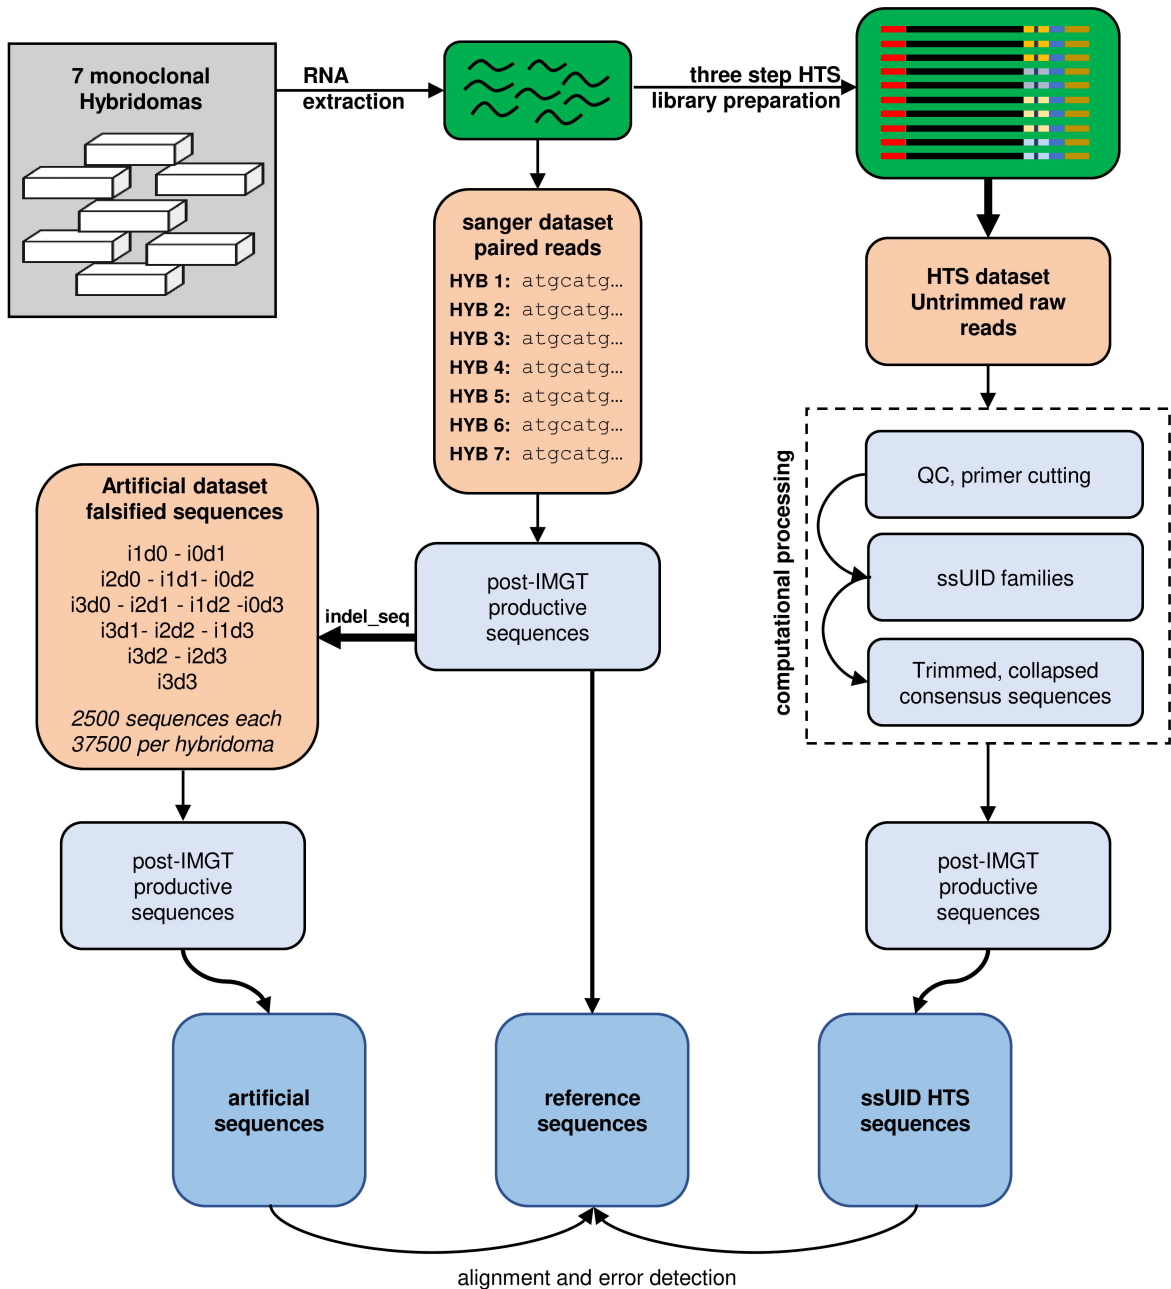

**A**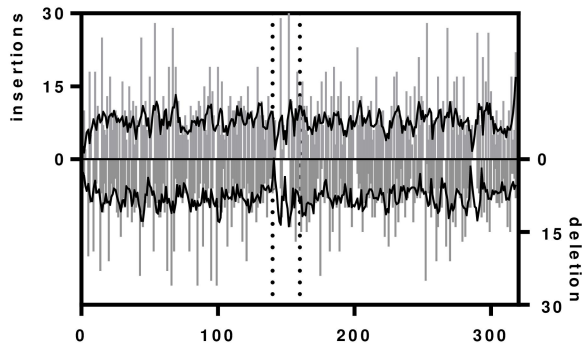**B**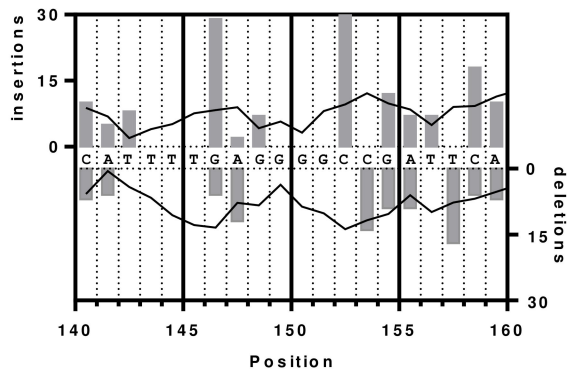**C**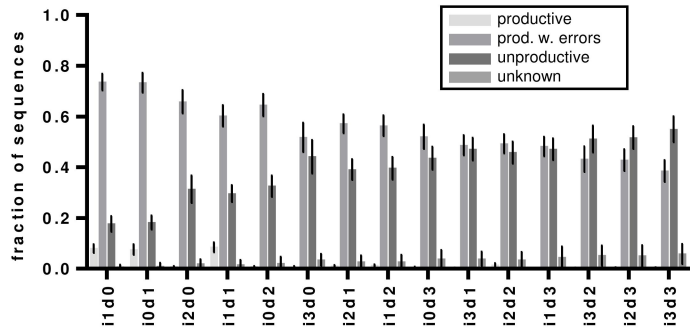**D**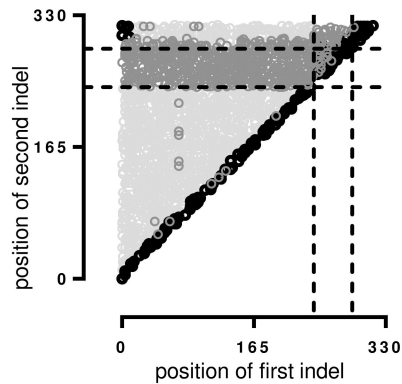

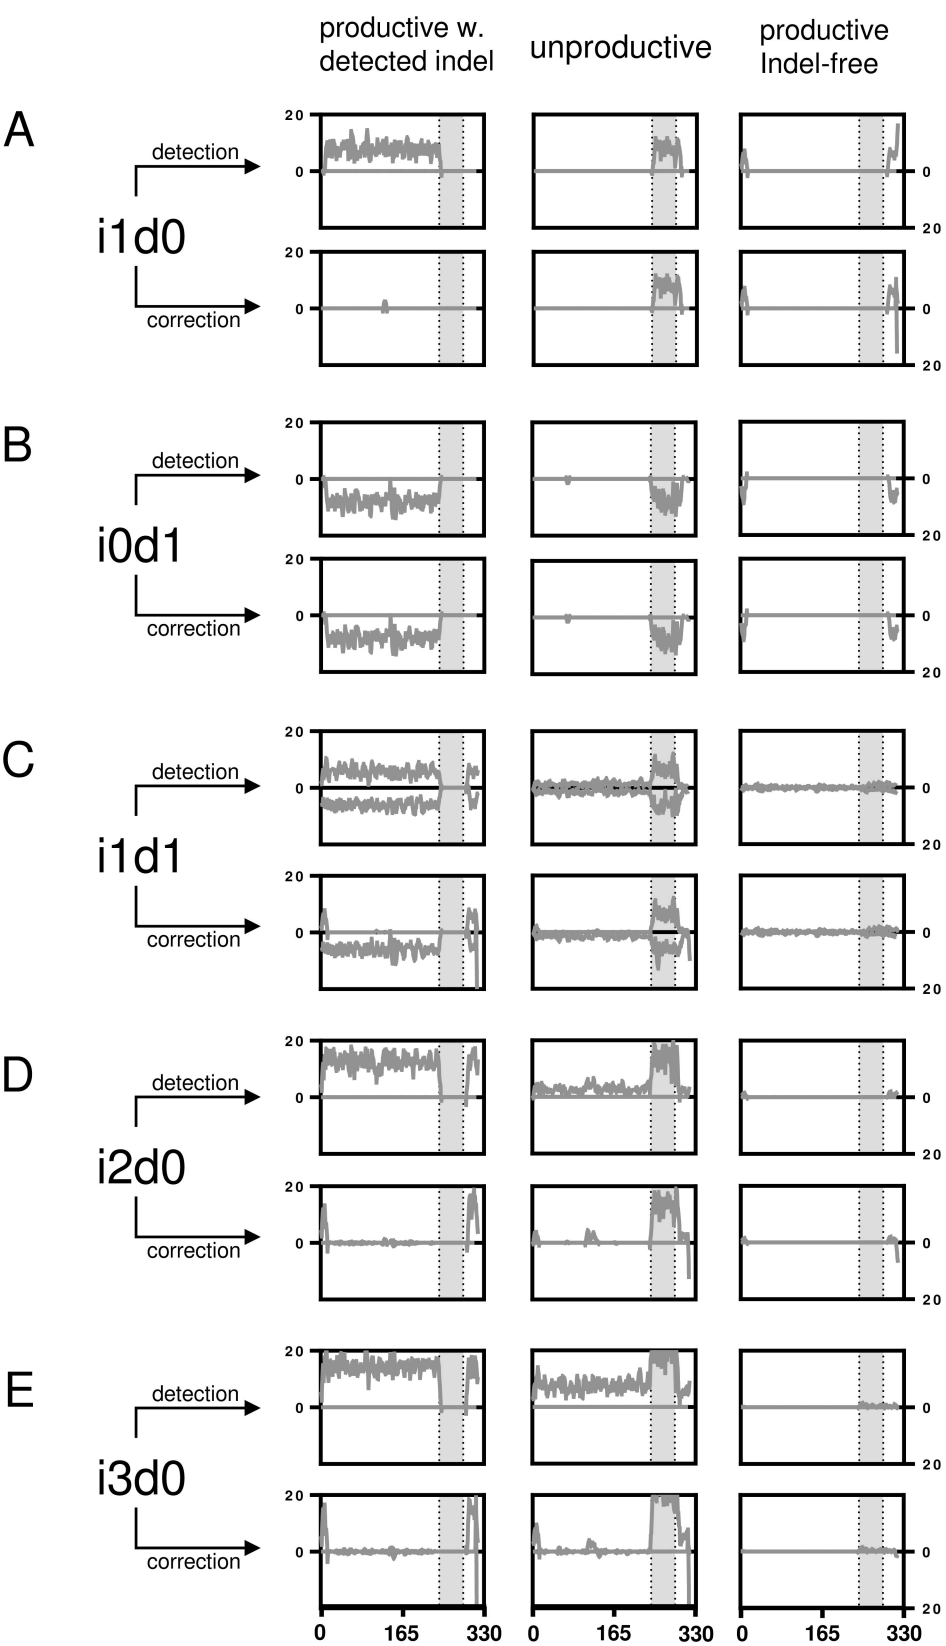

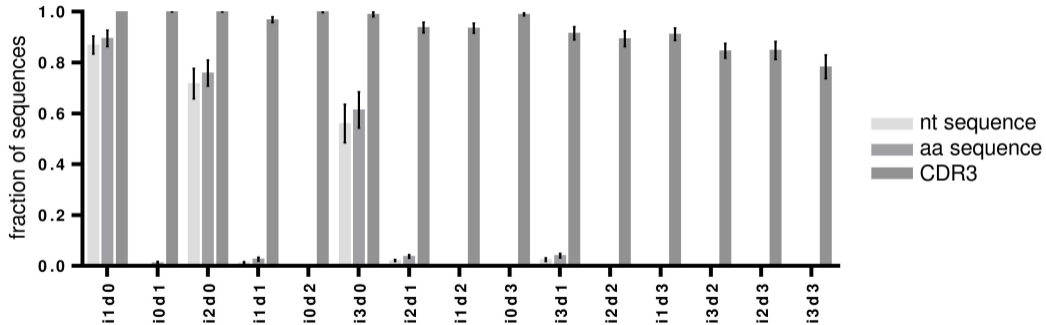

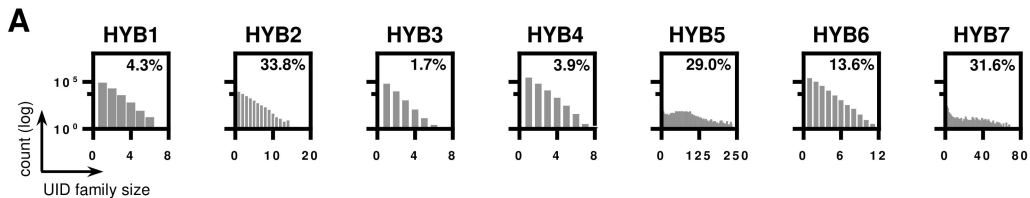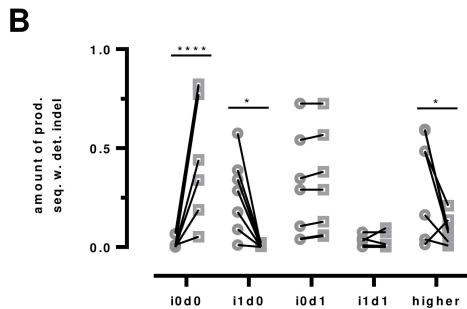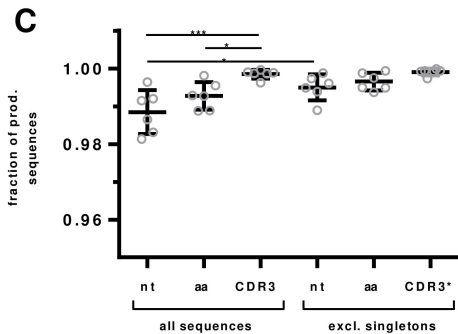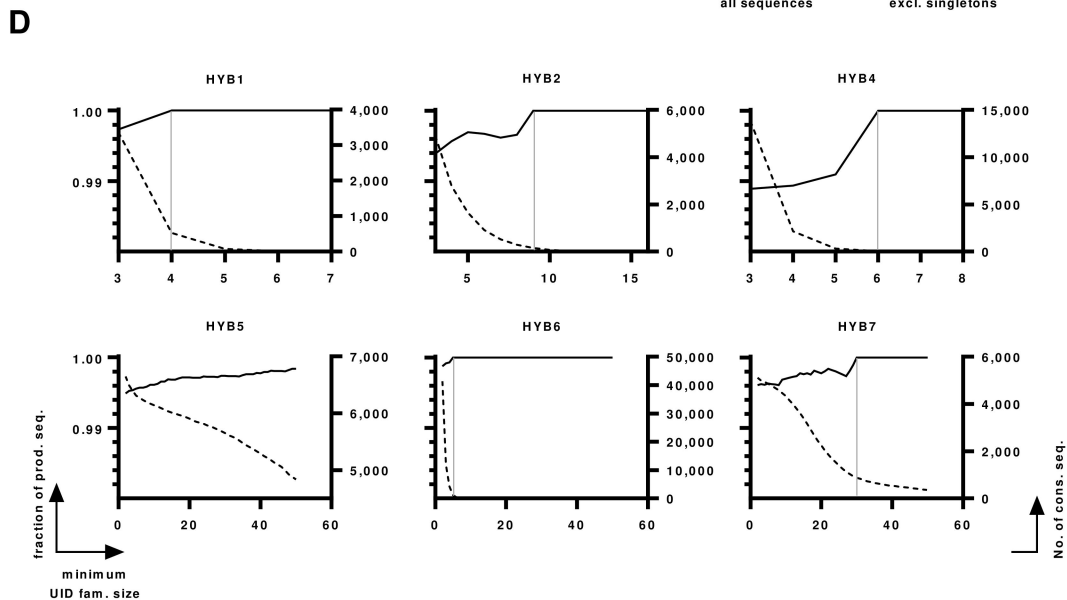

Source: https://www.biorxiv.org/content/10.1101/219568v1.full.pdf
